# Supplementary material for: Decoupling of δ 18 O from surface temperature in Antarctica in an ensemble of Historical simulations
Source: Copernicus journal article supplement (doi:10.5194/egusphere-2023-2735), 2023-12-07
Supplement: Supplementary file [file egusphere-2023-2735-AC2-supplement.pdf]

The manuscript employs simulations generated by an isotope-enabled General Circulation Model (GCM) to assess the temporal variations in isotopic composition, surface temperature, precipitation, and sea ice concentration within Antarctica over the past 200 years. Specifically, they suggest that differences between the simulated isotopic composition and temperature variations can be attributed to change of precipitation patterns due to the impact of sea ice concentration on the moisture pathways toward Antarctica.

The topic addressed by the manuscript is extremely important because the accuracy of the isotopic paleothermometer is directly affected by the link between isotopic composition in ice cores and temperature, which is only constrained empirically. Models are invaluable tools to study and explore the relationship between isotopic composition and temperature spatially, temporally, and with the different time scales. Here, the study based on the outputs of a single model (with occasional comparison with results from other studies using another one) lacks robustness to provide concrete evidence that can help strengthen our understanding of the isotopic paleothermometer. While the study suggested by the authors is worth pursuing, several shortcomings weaken what could otherwise be an important study for the field.

Many thanks for your time spent on providing this careful, thorough and very valuable review. We think it has very substantially improved our manuscript.

### **General comments:**

The manuscript predominantly relies on the outcomes of multiple runs from the HadCM3 model. Although the authors note in the Method section that 'HadCM3 provides a reasonable representation of Antarctic Climate and  $\delta^{18}\text{O}$ ,' there is a notable absence of a critical evaluation of the model's performance in comparison to available observations in Antarctica. The manuscript does not provide values indicating potential biases or errors in the model. It is challenging to assess the trustworthiness of the model outputs without a direct comparison with present-day observational data in HadCM3 iso, similar to the approach in Figure 1 of (Werner et al., 2018). This becomes more significant as the manuscript critiques observations without addressing potential biases in the studied model, even though the IPCC specifically relies on a diverse ensemble of models to balance potential biases. While a few articles are referenced (specifically (Holloway et al., 2016; Tindall et al., 2009)) that offer some comparisons with discrete values, the absence of confidence intervals makes it difficult to evaluate the robustness of the relationship between isotopic composition and temperature. This limitation affects the confidence in the authors' results, particularly given the extensive literature containing data that could be directly compared with the model outputs for temperature data (Jones et al., 2018)(Jones et al., 2018), isotopic composition (Dittmann et al., 2016; Ekaykin et al., 2002; Landais et al., 2017; Masson-Delmotte et al., 2008; Schlosser et al., 2004; Stenni et al., 2016; Touzeau et al., 2016), NSIDC products for the sea ice...

This is a good point. In response, we have added a new careful evaluation of the model. The new appendix (Appendix A), provide an evaluation of the simulated Antarctic Surface Air Temperature (SAT), precipitation (P) and precipitation weighted  $\delta^{18}\text{O}$ . The results show as expected a warm bias in the Antarctic interior – this is also observed in other models such as in Polar WRF (Zhang et al., 2022); and a dry bias in coastal regions. Overall HadCM3 performs roughly in line with expectations derived from other similar models, and have a reasonable representation of Antarctic surface climate and  $\delta^{18}\text{O}$ .

In the text, we referred to the appendix 1.94 to 1.96: “*HadCM3 provides a reasonable representation of Antarctic climate and  $\delta^{18}\text{O}$  (Appendix A, as well as Turner et al., 2006; Tindall et al., 2009; Holloway et al., 2016).*”

Appendix A can be found from page 26:

## Appendix A: HadCM3 evaluation of Antarctic surface climate and $\delta_{18}O$

### A1 Method

Here, we check that HadCM3 provides a reasonable representation of the Antarctic surface climate and  $\delta_{18}O$ . Surface Air Temperature (SAT) output data from HadCM3 are evaluated against the AntAWS dataset Wang et al. (2022); a compilation of Antarctic observations from 267 AWS (automatic weather station) operational between some parts of the period from 1980 to 2021. Surface mass balance (SMB) model output, calculated within the model code as precipitation minus evaporation (wind related processes are not accounted for by HadCM3), similarly are evaluated against AnSMB Wang et al. (2021); the most recent quality-controlled published SMB compilation extracted from stakes, snow pits, ice cores, ultrasonic sounders and ground-penetrating radar. Finally, simulated  $\delta_{18}O$  values are evaluated using the updated database compiled by GGoursaud et al. (2018); this combines all available firn, ice core, surface snow and precipitation observations of Antarctic  $\delta_{18}O$ . We show maps and scatter plots (model versus observed values) for SAT, SMB and  $\delta_{18}O$ . The comparison helps establish if the model underestimates the real spatial heterogeneity across Antarctica. Mean climatological values (20 year averages or more, averaged over the ensemble wherever possible) were calculated at each model grid point, and directly compared to the most equivalent observational climatological value (see paragraph above). The comparison uses output from a closest grid point comparison method.

### A2 Results

#### A2.1 SAT

Turner et al. (2006)'s evaluation of HadCM3 Antarctic climate, including especially near-surface air temperatures, mean sea level pressures and geopotential heights, shows a large warm bias in the Antarctic interior associated with a low-biased modeled orographic height (the highest model gridpoint elevations do not reach 4000 m asl). This finding remains fully consistent with the newer Wang et al. (2021) observation datasets (Figure A1). The minimum climatological Antarctic plateau SAT value is  $-37.2$  °C (Figure A1A), considerably warmer than the AntAWS minima of  $-64.6$  °C (Figure A1C). In regions where the observational temperature is above  $-30$  °C the model values of SAT match the observations better, although there remains a slightly underestimating (warm bias) in West Antarctica (Figure A1B and top right of Figure A1C). Altogether, although the warm bias in the Antarctic interior contributes to weaken the linear regression between the HadCM3 simulations and the observations (correlation coefficient of 0.76), Antarctic-mean simulated SAT is surprisingly good: Antarctic-mean climatological SAT is  $-25.1 \pm 14.1$  and  $-25.0 \pm 9.1$  in the observations and the HadCM3 model, respectively.

#### A3 SMB

Consistent with previous studies, SMB is slightly too low in the Antarctic interior in HadCM3 Turner et al. (2006), suggesting that the warm bias in these regions do not affect the modelled SMB. The largest model SMB errors (dry and wet biases) occur near the coasts (Figure A2B). The dry biases may be due to the

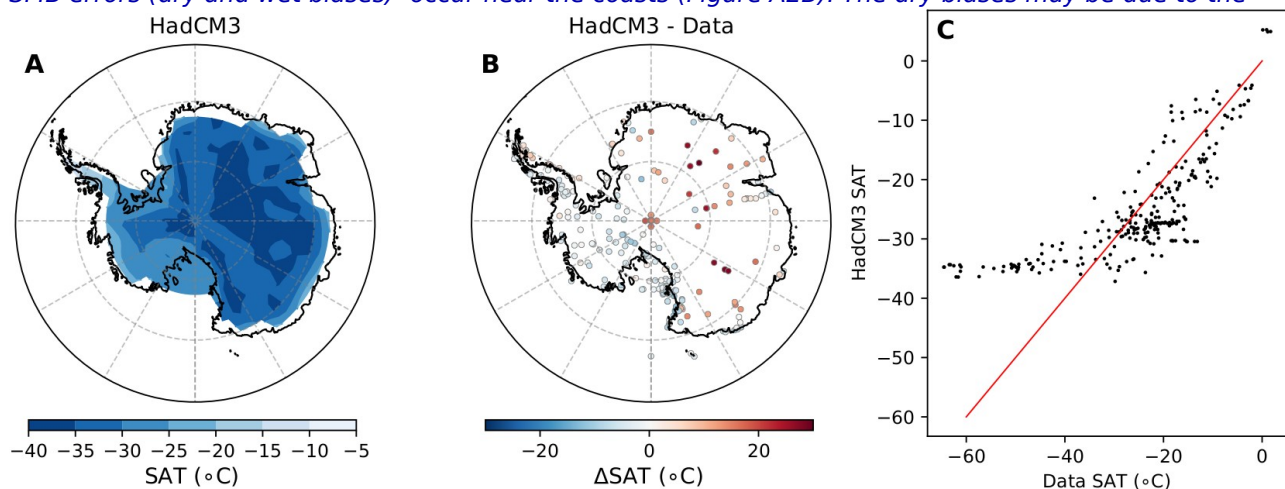

Figure A1. Surface Air Temperature evaluation (SAT): (A) map of the time-averaged HadCM3 SAT distribution over Antarctic resulting from the ensemble mean for the Historical period (in °C); (B) SAT difference between the time-averaged HadCM3 outputs from the ensemble mean for the Historical period, coarse HadCM3 grid, altering a realistic orography and the corresponding SAT observations (in °C); and (C) linear regression between the time-averaged HadCM3 outputs from the ensemble mean for the Historical period, and the corresponding SAT observations (black points). The red line is a 1:1 data-model slope.

representation of the ascending air masses that provide precipitation to these coastal regions. The coarse model grid biases can be seen on Figure A2C as a step representation of the black points compared to an expected linear regression. (Turner et al., 2006) also attribute the wet coastal biases to an overly intense mean sea level pressure field gradient: stronger than observed air flows produce excess precipitation on the west side of the Antarctic Peninsula. These aspects reduce the linear regression correlation (correlation coefficient of 0.70). The Antarctic-mean climatological SMB difference between the observations and HadCM3 is -29.7 mm/month.

#### A4 6180

The distribution of the simulated  $\delta^{18}\text{O}$  over Antarctica is similar to observations (Antarctic-means of  $-36.2 \pm 9.7$  ‰ and  $-37.4 \pm 10.3$  ‰ in the observations and the HadCM3 simulations respectively; minimum values of  $-61.3$  ‰ and  $-57.9$  ‰ in the observations and the HadCM3 simulations respectively; maximum values of  $-3.2$  ‰ and  $-7.7$  ‰ in the observations and the HadCM3 simulations respectively). Excessively depleted values occur in the Antarctic interior (Figure A3). These are associated with the warm bias. Overly enriched values are observed over the Peninsula and the Weddell Sea coast, consistently with the wet bias in these region. Nevertheless, the HadCM3 historical simulations do capture the  $\delta^{18}\text{O}$  observations relatively well, as shown by the strong relationship between the outputs and the observations (correlation coefficient of 0.84 and slope of  $0.90 \pm 0.02$  ‰.‰<sup>-1</sup>).

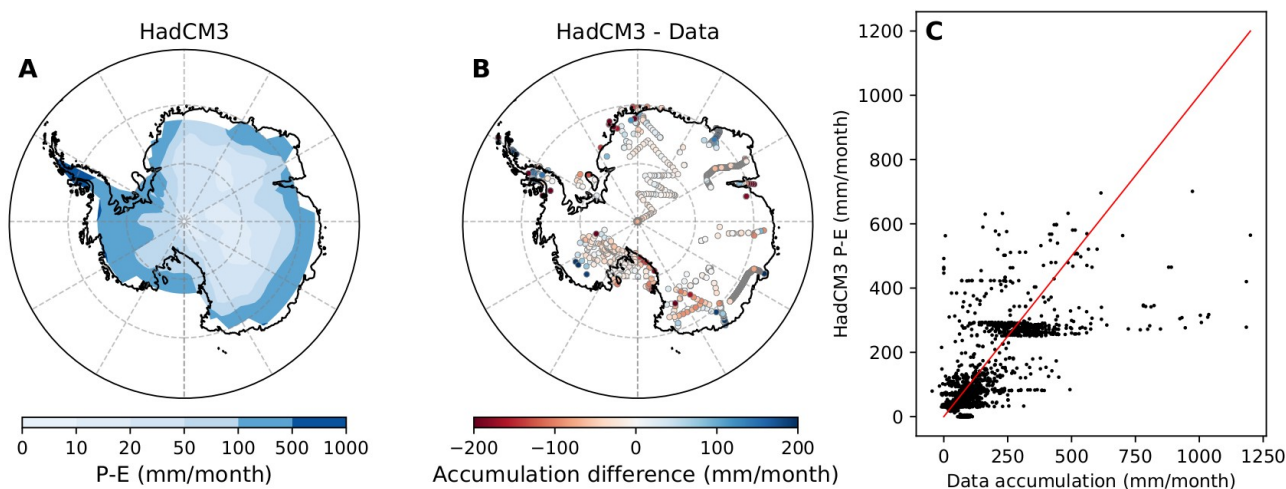

Figure A2. Surface Mass Balance evaluation (SMB): (A) map of the time-averaged HadCM3 Precipitation minus Evaporation (P-E) distribution over Antarctic resulting from the ensemble mean for the Historical period (in mm/month); (B) SMB difference between the time-averaged HadCM3 outputs from the ensemble mean for the Historical period, and the corresponding observations (in mm/month); and © linear regression between the time-averaged HadCM3 outputs from the ensemble mean for the Historical period, and the corresponding SMB observations (black points). The red line is a 1:1 data-model slope.

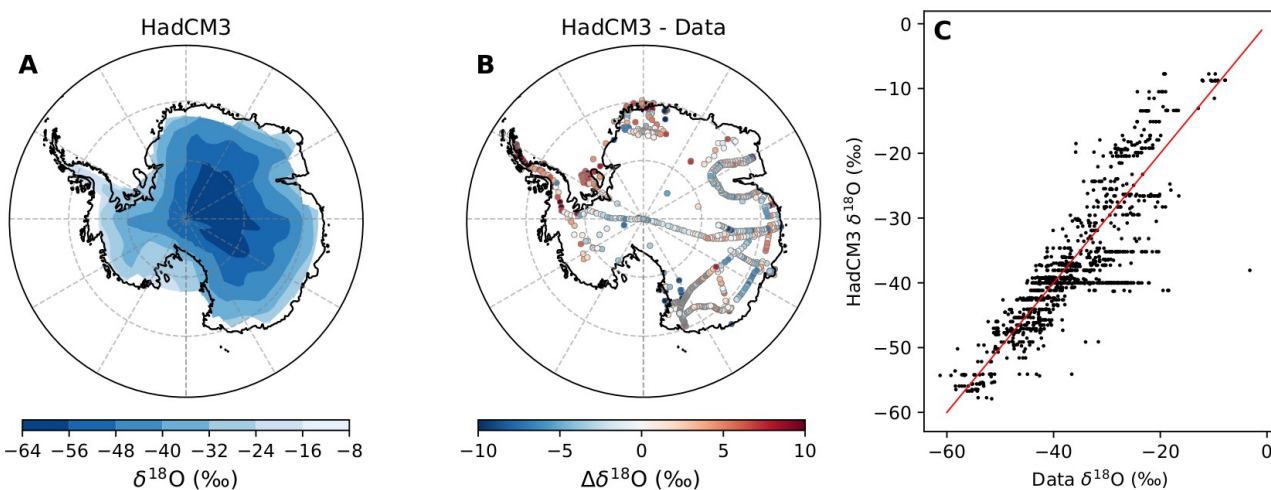

Figure A3.  $\delta^{18}\text{O}$  evaluation: (A) map of the time-averaged HadCM3  $\delta^{18}\text{O}$  distribution over Antarctic resulting from the ensemble mean for the Historical period (in ‰); (B) SMB difference between the time-averaged HadCM3 outputs from the ensemble mean for the Historical period, and the corresponding

observations (in ‰); and (C) linear regression between the time-averaged HadCM3 outputs from the ensemble mean for the Historical period, and the corresponding  $\delta^{18}\text{O}$  observations (black points). The red line is a 1:1 data-model slope.

Some of the results are compared with outputs from another General Circulation Model (GCM), specifically ECHAM5wiso, to assess 'model dependency.' This comparison reveals substantial differences, with predicted slopes between isotopic composition and temperature regionally or across all of Antarctica showing almost a 100% disparity. These findings contribute to a diminishing confidence in the outputs of the HadCM3 model. It's worth noting that the comparison involves an older version of ECHAM with isotopes (ECHAM6wiso, released in 2021, has been demonstrated to be more accurate according to (Cauquoin and Werner, 2021)). Additionally, ECHAM5wiso was nudged with ERA40, a choice that may seem unconventional given the availability of more recent products like ERA-interim in 2006 (Dee et al., 2011) and ERA5 in 2018 (Hersbach et al., 2020).

Following the suggestions above, we replaced the analysis with the latest generation of the AGCM ECHAM equipped with water isotopes: ECHAM6-wiso (Stevens et al., 2013, Cauquoin et al., 2019). As stated by the reviewer, compared to ECHAM5-wiso, the performance of the water isotopes in ECHAM6-wiso is clearly improved. This is attributed to: (i) a modification of the supersaturation parameters ; (ii) that the kinetic fractionation at the evaporation over oceans is now assumed to be independent of the wind speed in order to better represent the d-excess versus deuterium relationship from the Antarctic Snow reported by Masson-Delmotte et al. (2008) ; and finally (iii) that the sublimation processes now accounts for the isotopic content of snow over sea ice. Based on the evaluation of global simulations against ERA-interim and ERA5 reanalyses, Cauquoin and Werner (2021) report that the nudging does not significantly change the simulated isotope values, while increasing the resolution generally improves the performance of the simulations. However, the evaluation of the simulated water stable isotopes in precipitation over Antarctica remains rather qualitative (Figure 1, Cauquoin and Werner, 2021).

Having obtained this new model output data from the newer version of ECHAM, we performed the same analysis as previously applied to ECHAM5 and HadCM3. As implied by the reviewer, using the newer version of the ECHAM indeed entirely resolve the discrepancy between the models – ECHAM6-wiso and HadCM3 (in the newer ECHAM6 version) now have equivalent SAT- $\delta^{18}\text{O}$  surface air temperature relationships.

We thus made the following changes in the text:

- In section 2 (“Data and methods”), l.106 to 114:

*“Our Historical SAT– $\delta^{18}\text{O}$  linear relationship at the regional scale are compared with the regional slopes and correlation coefficients that we computed from the AGCM ECHAM6-wiso equipped with water stable isotopes (Cauquoin et al., 2019). The water stable module of this last generation of the model ECHAM was updated compared to its predecessor, especially (i) the supersaturation parameters, (ii) the kinetic fractionation at the evaporation over oceans, now assumed to be independent of the wind speed in order to better represent the d-excess versus deuterium relationship from the Antarctic Snow reported by (Masson-Delmotte et al., 2008), and finally (iii) the sublimation processes now accounting for the isotopic content of snow over sea ice. Here, we use a simulation run at a T127L95 resolution (  $0.9^\circ \times 0.9^\circ$  horizontal resolution and 95 vertical levels) and nudged towards the ERA5 reanalyses (Hersbach et al., 2020) over the period 1979 – 2022 Cauquoin and Werner (2021).”*

- In section 4 (“Temperature versus  $\delta^{18}\text{O}$  relationships”), l.211:

*“To enable a consideration of model dependency, we also compare our Historical ensemble against a nudged ECHAM6-wiso simulation (Table 1).”*

- In section 4.2 (“Stability over the Historical period and model dependency”), l.242 to l.253:

“Interestingly, the ECHAM6-wiso simulation and the last 50 years of our HadCM3 simulation display similar SAT- $\delta^{18}\text{O}$  relationships. ECHAM6-wiso simulates slightly stronger relationships with a mean correlation coefficient difference of 0.04, while gradients tend to be slightly higher in HadCM3 with a gradient difference of 0.13 ‰/°C. The only notable differences are for Dronning Maud Land and the Indian coast with stronger relationships and higher gradients simulated by HadCM3 (Table 1). Thus, whilst it is unclear whether the nudging of ECHAM6 towards ERA5 reanalysis, the model resolutions or differences in sea ice behaviours, are the main reason for these discrepancies, it is clear that simulated temperature versus  $\delta^{18}\text{O}$  relationships have low but significant uncertainties. These need to be considered, both regionally and for the most relevant climate state, before being undertaking any inferences of past temperatures using isotopes measured in ice cores.”

In section 6 (“conclusions”), 1.307 to 308:

“Interestingly, we find similar but slightly weaker SAT- $\delta^{18}\text{O}$  correlations and slightly higher gradients compared to ERA5 –nudged ECHAM6-wiso simulations at the regional scale.”

Table 1 is updated to reflect the replacement of ECHAM5 with ECHAM6 output.

**Table 1. Historical SAT- $\delta^{18}\text{O}$  relationships at the regional scale.** Slope (in ‰/°C) plus or minus the standard error, and the correlation coefficient (into brackets) of the surface-weighted average of surface air temperature against the surface-weighted average of  $\delta^{18}\text{O}$  for the Antarctic regions as defined in the PAGES Antarctica2k project (Stenni et al., 2017): the plateau, the Indian coast, the Weddell coast, the Peninsula, the WAIS, Victoria Land and Dronning Maud Land, simulated by the ECHAM6-wiso model (, over the period 1979-2022, 44 points, 'ECHAM6-wiso') and simulated by HadCM3 over the last 50 years (1955-2004, 50 points, 'last 50 years of HadCM3'), and over the whole historical simulated period (1851-2004, 154 points, 'Historical HadCM3') using the ensemble mean of the six simulations (see methods). All the relationships are significant (p-values<0.05).

|                    | ECHAM6-wiso      | last 50 years of HadCM3 | Historical HadCM3 |
|--------------------|------------------|-------------------------|-------------------|
| Plateau            | 0.48±0.07 [0.71] | 0.61±0.14 [0.52]        | 0.57±0.07 [0.53]  |
| Indian coast       | 0.29±0.08 [0.48] | 0.55±0.15 [0.46]        | 0.67±0.07 [0.59]  |
| Weddell coast      | 0.49±0.11 [0.57] | 0.57±0.11 [0.59]        | 0.57±0.07 [0.57]  |
| Peninsula          | 0.37±0.05 [0.74] | 0.28±0.06 [0.52]        | 0.31±0.02 [0.71]  |
| WAIS               | 0.56±0.07 [0.75] | 0.60±0.12 [0.58]        | 0.50±0.05 [0.61]  |
| Victoria Land      | 0.43±0.13 [0.46] | -                       | 0.30±0.12 [0.19]  |
| Dronning Maud Land | 0.43±0.13 [0.46] | 0.76±0.12 [0.69]        | 0.49±0.05 [0.60]  |
| West Antarctica    | 0.49±0.11 [0.59] | 0.50±0.10 [0.57]        | 0.70±0.07 [0.62]  |
| East Antarctica    | 0.48±0.08 [0.69] | 0.49±0.10 [0.57]        | 0.56±0.06 [0.58]  |
| All Antarctica     | 0.45±0.09 [0.59] | 0.67±0.13 [0.60]        | 0.57±0.06 [0.62]  |

Overall, the manuscript does not engage in a critical discussion regarding the capabilities of GCMs (CMIP5 or CMIP6) to accurately depict regional-scale climate dynamics. This is noteworthy given the existing body of literature highlighting that the simulated variability often underestimates (Laepplé and Huybers, 2014; Shao and Ditlevsen, 2016; Zhu et al., 2019). It would be beneficial for the manuscript to address the impact of discrepancies between modelling outputs and observations within this context. A thoughtful consideration of this aspect would enhance the argument and bolster confidence in the assertion that the results from HadCM3 are reliable in this context.

This is another valuable point. For reasons of focus and space we cannot engage in a particularly large discussion regarding the capabilities of GCMs (CMIP5 or CMIP6) to accurately depict regional-scale climate dynamics. However, as implied in this comment, the manuscript is improved by some engagement with the body of literature highlighting that the simulated variability often underestimated (Laepplé and Huybers, 2014; Shao and Ditlevsen, 2016; Zhu et al., 2019).

It would be beneficial for the manuscript to address the impact of discrepancies between modelling outputs and observations within this context. A thoughtful consideration of this aspect would enhance the argument and bolster confidence in the assertion that the results from HadCM3 are reliable in this context.

We added add suggestions for further comparisons with observations towards the end of the Section 6 (“Conclusion”), l.329 to 332: *“Finally, more stable water isotope records from Antarctic ice and firn core data are more than needed to evaluate models, as well as to lead model-data investigations of past climates, comparing SAT– $\delta^{18}\text{O}$  relationships from different water stable isotopes enabled model, in line with the work of the Stable Water Isotope Intercomparison Group 2 (SWING) (Risi et al., 2012).”*

The comparison with observational products seems to selectively draw from publications that align with the authors' findings, potentially overlooking contributions that present contrasting results (Clem et al., 2020; Jones et al., 2019) or dismissing them without explicit justification (Casado et al., 2023), in which I was involved as a lead author). There are several instances detailed below in the specific comments when the authors obtained different results using the same calculation (trends from linear regression) and presumably the same datasets (PAGES 2k) and obtain different results without providing an explanation. Notably, in (Casado et al., 2023), considerable effort was invested in validating trend calculations using the products from (Stenni et al., 2017). It would be valuable for the manuscript to articulate why different trends are identified here, especially as the current narrative suggests a potential error in (Casado et al., 2023). While the scientific method encourages revisiting and improving upon previous results, the manuscript should provide evidence-based arguments when challenging peer-reviewed scientific findings, moving beyond statements like 'It is unclear why the trend in (Casado et al., 2023) is higher.’’

We welcome the statistical efforts made in your recent study (Casado et al., 2023). Our wordings were inappropriate: we obviously did not mean that your results were wrong but that we were not able to attribute the mismatch. Instead, we should have developed the idea behind the sentence « It is unclear why the trend in Casado et al. (2023) is higher », the revised version of these sentences read, p.6 l.182 to l.185:

*« Casado et al. (2023) provide a higher trend from 1950–2005 of  $0.11\pm 0.02$  ‰ per decade, based on ice core data. Different reasons could explain that mismatch that we are not able to elucidate so far, inter alia: (i) a model discrepancy to resolve processes, (ii) the model resolution, (iii) the geographical distribution of the ice core locations, (iv) the different methods for the SAT –  $\delta^{18}\text{O}$  calibration. »*

In Section 5 (Drivers of  $\delta^{18}\text{O}$  changes), there appears to be a lack of evidence supporting the hypothesis regarding the mechanisms behind  $\delta^{18}\text{O}$  variations. It is commonly acknowledged that correlation does not necessarily imply causation. In this context, the connections between  $\delta^{18}\text{O}$  and other climatic parameters are not based on correlation but on the representation of end-members (warmest and coldest conditions) on a map. The linkage between  $\delta^{18}\text{O}$  and temperature, specifically attributing the decoupling to sea ice concentration as depicted in Figures 4 and 5, is unclear. Notably, the authors seem to have overlooked the potential impact of the SAM, which has been suggested to influence both isotopic composition (Kino et al., 2021) and sea ice concentration around Antarctica (Eayrs et al., 2021).

We are aware that our study is not exhaustive. More analyses could be made to deepen the explanation of processes behind our results. Especially, a complete investigation on the atmospheric circulation change could be lead, addressing the effect of the different teleconnections, through different modes impacting Antarctica, for example, as provided by Marshall and Thompson (2016) for SAT.

To help address this comment, new analysis of the impact of the SAM is given in Appendix G. This shows that HadCM3 reproduces the impacts of SAM on SAT and P reported in previous studies (Clem et al., 2016; Fogt et al., 2020), *i.e.* colder and drier conditions in a positive SAM. For  $\delta^{18}\text{O}$ , HadCM3 simulates depletion in most areas of the Antarctic continent while the SAM is in a positive phase, but these results are associated with relatively low correlation coefficients with means of  $-0.26\pm 0.11$  over the Historical period and  $-0.27\pm 0.12$  for the period 1950 – 2004. We thus conclude that our simulations cannot establish a robust link between the SAM and the Antarctic precipitation weighted  $\delta^{18}\text{O}$ . This result is supported by the diversity of  $\delta^{18}\text{O}$  measurements from precipitation and firn/ice cores on different Antarctic locations (*e.g.* Vega et al., 2016; Kino et al., 2021; Servettaz, 2022; Dreossi et al., 2023). Moreover, it was shown that SAM impacts are different with the ENSO phases (Wilson et al., 2016), and that other modes affect Antarctic climate (*e.g.* Shields et al., 2022). Further analysis on the impact of the atmospheric circulation on Antarctic precipitation weighted  $\delta^{18}\text{O}$  for the Historical period would need to be the subject of a future study. The new results are references in Section 5 (“Drivers”) p10 l.292 to l.295 as:

*“The dynamic processes behind the sea ice extent induced  $\delta^{18}\text{O}$  changes are complex and multiple. Although the Southern Annular Mode, leading mode of the atmospheric variability in the Southern Hemisphere, might explain part of these  $\delta^{18}\text{O}$  simulated changes (Appendix G), a more comprehensive study might investigate the impact of the atmospheric circulation changes.”*

In the conclusion, l.310, we replaced:

*“We identify three processes [...]”* by *“We suggest [...]”*, meaning that an extended study is necessary to check the atmospheric processes at the origin of our simulated results.

Here is our new Appendix G:

*The Southern Annular Mode (SAM) is the leading mode of atmospheric variability in the Southern Hemisphere (Thompson and Wallace, 2000). Especially, it describes the position and the strength of the polar jet position, the southern westerly belt and the associated storm tracks. A positive (negative) phase of the SAM is associated with an intensified (weakened) pole-ward (northward) shift of the polar jet. The SAM is thus the preferred studied mode to investigate the Southern Hemisphere teleconnection with lower latitudes. Here, we used the definition of the SAM index following the approach of Gong and Wang (1999), as the difference between the normalized monthly zonal mean sea level pressure between 40°S and 65°S. Here we used the period 1961–1990 as a reference interval.*

$$SAM = \frac{P_{40} - \mu_{40}}{\sigma_{40}} - \frac{P_{65} - \mu_{65}}{\sigma_{65}}$$

*where  $P_{40}$  and  $P_{65}$  are the monthly mean sea level pressure at 40°S and 65°S,  $\mu_{40}$  and  $\mu_{65}$  are the mean of the monthly mean sea level pressure at 40°S and 65°S over the reference interval 1961–1990, and  $\sigma_{40}$  and  $\sigma_{65}$  are the standard deviations of the monthly mean sea level pressure at 40°S and 65°S over the reference interval 1961–1990. We computed the linear regressions between the calculated SAM and our climate variables (Figure G1): (i) the surface air temperature (SAT), (ii) the precipitation (P) and finally (iii) the precipitation weighted  $\delta^{18}\text{O}$  ( $\delta^{18}\text{O}$ ). These linear regressions were computed over the whole Historical simulated period, as well as for the recent period 1950–2004, at the annual scale.*

*Note that, as done in the main corpus of the manuscript, we computed these linear regressions using the stack of the ensemble members, resulting in 918 points for the Historical period (1851–2004) and 324 points for the period 1950–2004. Within the frame of the CMIP5 project, the ability of HadCM3 to reproduce the SAM was evaluated (Zheng et al., 2013). As for all the CMIP5 models, HadCM3 overestimates the SAM index variability (Zheng et al., 2013; Zhang et al., 2022). Nevertheless, it reproduces the decadal variability of the SAM index and displays the best*

correlation coefficient between modeled and observed detrended SAM index (Zheng et al., 2013). Previous studies reported, based on observations, that main of the Antarctic continent is globally colder and drier while the SAM is in a positive phase, as the stronger southern westerly wind belt reduces the exchanges with warmer air masses from midlatitude regions, at the exception of the Peninsula (Clem et al., 2016). These effects are reproduced in our HadCM3 simulations, as shown by the correlation coefficient values between the SAM and the SAT that are positive over the northern Antarctic peninsula, but negative over the rest of the continent, especially on coastal areas (Figures G1A and G1D). Similarly, it was shown that there is less southward moisture advection towards the Antarctic interior in a positive phase of the SAM, reducing precipitations. In our simulations (Figures G1B and G1E), this effect is enhanced over the Antarctic plateau, Victoria Land and Marie Byrd Land. At the opposite, the Antarctic peninsula receives more precipitation. However, the discrepancy in the HadCM3 orography unables the «shadow effect» decreasing precipitation on the Eastern part of the peninsula due to the presence of mountains (Fogt and Marshall, 2020). The link between water stable isotopes and the SAM is less settled. A couple of publications displayed a correlation between the water stable isotope content in ice cores and the SAM index, but no systematic method allowed an established link. For instance, (Servettaz et al., 2022) suggest some impacts of the SAM on the isotopic content of the Aurora Basin North ice core over the last millennium, although not on the whole length of the core. Also, over the Fimbull Ice Sheet, Vega et al. (2016) suggest that the absence of correspondence between water stable isotopes and SAT might be explained by changes in atmospheric circulation, supported by a high correlation between  $d$ -excess measured in the KM and BI ices cores and the SAM index. Kino et al. (2021) showed the contribution of SAM over precipitation weighted  $\delta^{18}O$  at the daily scale simulated by the MIROC5-iso model nudged toward the JRA-25 reanalyses, over the period 1981–2010 at Dome Fuji. However, they warn that it does not prevail on all antarctic locations of the Antarctic plateau. For instance, Dome C is less sensitive to SAM compared to possible other teleconnections modes (Dreossi et al., 2023). In our simulations, the correlation coefficients between the SAM and precipitation weighted  $\delta^{18}O$  are significant and negative over the whole continent (Figures G1.C and G1.F), but remain weak, with a mean of  $-0.26 \pm 0.11$  over the Historical period and  $-0.27 \pm 0.12$  for the period 1950–2004. From our simulations, we thus cannot neither establish a robust link between the SAM and the Antarctic precipitation weighted  $\delta^{18}O$ . However, studying the impact of the atmospheric circulation change on Antarctic precipitation weighted  $\delta^{18}O$  should not be boiled down to the link with the SAM. For instance, only some El Nino Southern Oscillation (ENSO)/SAM combinations (El Nino/negative SAM and La Nina/positive SAM) contribute to strengthen the Amundsen Sea Low (e.g. Wilson et al., 2016), as observed through the analysis of the the Roosevelt Island Climate Evolution (RICE)  $\delta^{18}O$  Emanuelsson et al. (2023). SAM-induced processes impacting Antarctic precipitation weighted  $\delta^{18}O$  are also not trivial: SAM changes SAT, precipitation regimes but also the sea ice in a more complex manner (Fogt and Marshall, 2020). Other modes affect the Antarctic atmospheric circulation and might explain the  $\delta^{18}O$  changes, as for the Indian Ocean Dipole in phase with El Nino through the production of atmospheric rivers (Shields et al., 2022).



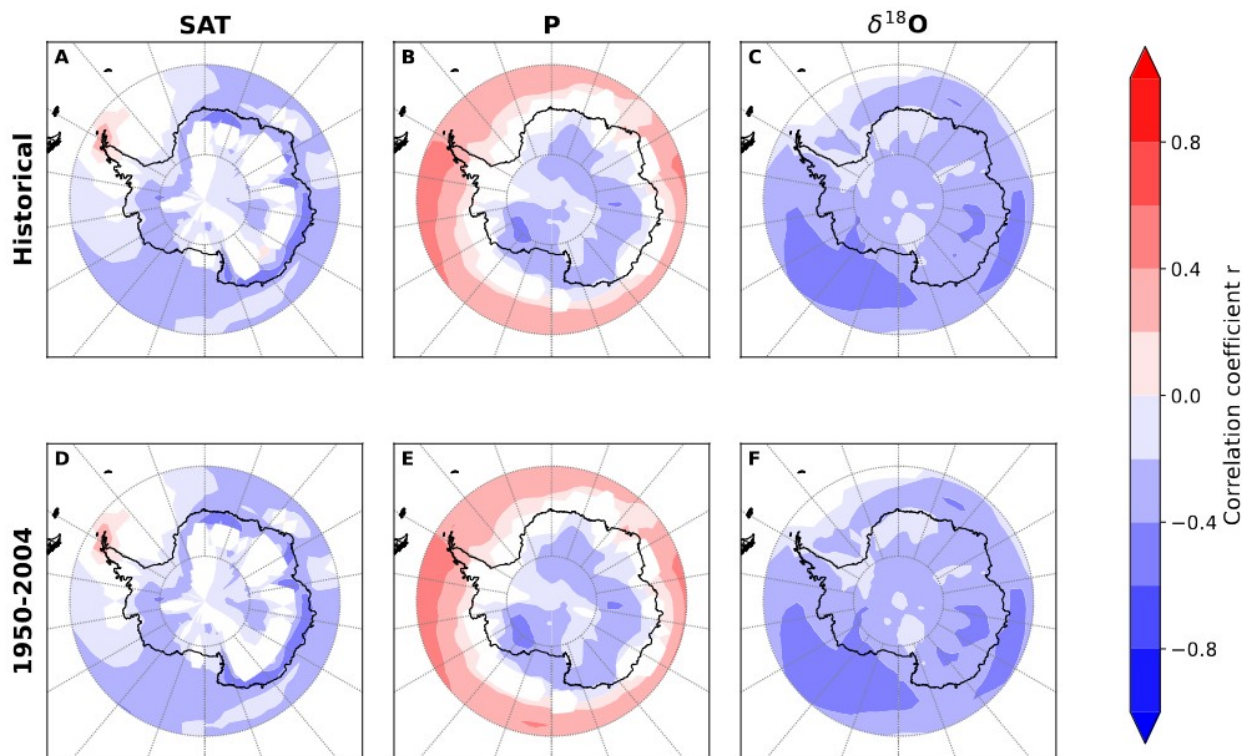

Figure G1. Correlation coefficients between the Southern Annular Mode index and the Surface Air Temperature ("SAT", A and D), the precipitations («P», B and E), and the precipitation weighted  $\delta^{18}\text{O}$  (C and E) simulated by the HadCM3 model at the annual scale for the Historical Period (1851–2004, first row) and the 1950–2004 period (second row). Only significant relationships are shown ( $p$ -value < 0.05).

### **Specific comments:**

Lines 5 to 6: “Our ensemble captures observed historical SAT and precipitation trends, and weak  $\delta^{18}\text{O}$  trends.” Currently, this statement is not supported within this manuscript. It does conflict with recent publications on the topic (Casado et al., 2023; Clem et al., 2020; Jones et al., 2019) without clear justifications for considering this manuscript's results as more valid than those published in peer-reviewed journals.

*Addressed, please see new Appendix A on the model evaluation over Antarctica.*

Lines 6 to 7: “The weak  $\delta^{18}\text{O}$  trends mean there is no significant relationship between SAT and  $\delta^{18}\text{O}$  over one third of Antarctica, and also half of our considered ice core sites, though relationships are stronger when using regional averages.” While it can be debated, it’s important to note that in Antarctica, every site where precipitation isotopic composition has been sampled demonstrates a remarkably robust correlation with temperature (Dittmann et al., 2016; Fujita and Abe, 2006; Landais et al., 2012; Schlosser et al., 2004; Stenni et al., 2016; Touzeau et al., 2016). Any counterargument should be accompanied by evidence explaining why the findings in this manuscript should be considered more valid than those published in peer-reviewed journals.

We agree that the published relationships based on precipitation samples all showed a significant correlation between SAT and  $\delta^{18}\text{O}$ . However, they remain few, so we cannot exclude that the absence of SAT –  $\delta^{18}\text{O}$  derived from firn/ice core (especially for coastal area over the last decades, please see Goursaud et al., 2019) were preserved from the atmosphere. As a few examples no relationship was found in firn/ice cores from Dronning Maud Land, near the Neumayer station

(Vega et al., 2016), in the Ross Sea sector (Bertler et al., 2011), and in Adélie Land, close to Dumont d'Urville (Goursaud et al., 2017).

Lines 19 to 21: “The collapse of Antarctic ice shelves have similarly increased in frequency (Graham et al., 2022; Milillo et al., 2022; Wille et al., 2022), with a 1,600 square kilometers iceberg breaking away from the Brunt ice shelf on January 22nd, 2023.” This seems anecdotal and unrelated to the topic of the manuscript.

Addressed, we removed that part of the sentence : « *The collapse of Antarctic ice shelves have similarly increased in frequency (Graham et al., 2022; Milillo et al., 2022; Wille et al., 2022).* »

Lines 26 to 27: “The remote nature of this vast continent means that observational data covering Antarctica are sparse in both space and time (Turner et al., 2004).”

Rewrite, too vague and imprecise. Satellite data are observational, and they are regularly gridded and relatively dense. Also, most of the observations are in the last 50 years, so they are not "sparse in time", but rather extremely concentrated on a specific period. I understand what you meant, but the sentence could be improved.

We updated the manuscript:

*“The relatively short satellite record (since 1979 only), and sparsity of in-situ observational data from Antarctica, mean that reconstruction of past temperature change is important for understanding natural variability, and hence our ability to detect anthropogenic climate change in Antarctica (Turner et al., 2004; Casado et al. 2023).”*

Lines 27 to 28: “The reconstruction of past temperature change is thus of paramount importance for understanding natural variability, versus effects in response to anthropogenic climate change” “paramount importance” does not seem appropriate here. “versus effects in response...” is nonsensical.

*Removed, as above.*

Lines 34 to 35: “it is sometimes referred as the ‘ice core paleothermometer’ (Lorius and Merlivat, 1977; Masson et al., 2000).”

It is referred as the “Isotopic paleothermometer” in the specific references that are cited here. Also Lorius and Merlivat 1977 does not qualify as a peer-reviewed publication, consider replacing by (Lorius et al., 1969). Other proxies from ice cores can be used for past temperature reconstructions, for instance the borehole thermometry.

Addressed « ice core paleothermometer » replaced by « isotopic paleothermometer ». And Lorius et al., 1969 cited instead of Lorius and Merlivat, 1977.

Line 36: “The paleothermometer” is not sufficient, should be describe as “isotopic paleothermometer”.

Done.

Lines 38 to 41: “This ice core based record was then used to show that simulated temperatures from the Atmospheric General Circulation (AGCM) models run in the frame of the Coupled Model

Intercomparison Project Phases 5 (Taylor et al., 2012) and 6 (Eyring et al., 2016, CMIP6) are too low. However, the paleothermometer relationship has been shown to vary spatially over the Antarctic continent (e.g. Sime et al., 2008, 2009a).”

(Casado et al., 2023) does not state that the temperatures are not too low, but that the variability (natural and forced) is too low. In addition, variable isotope-temperature conversions are used for the different regions of Antarctica in Casado et al, 2023, so it seems that the use of "however" here suggests an opposition that is not based on actual opposite point of views.

L.37 to L.40, we corrected: « *This ice core based record was then used to show that the simulated temperature variability from the Atmospheric General Circulation (AGCM) models run in the frame of the Coupled Model Intercomparison Project Phases 5 (Taylor et al., 2012) and 6 (Eyring et al., 2016, CMIP6) is too low.* »

Also, we removed: « However » : « *The isotopic paleothermometer relationship has been shown to vary spatially over the Antarctic continent (e.g. Sime et al., 2008, 2009a).* »

Line 49: “The geographical variability in the ‘paleothermometer’ is due to controls on  $\delta^{18}\text{O}$  other than SAT.” This statement appears slightly misleading in the sense that it doesn't reflect that Rayleigh distillation (Dansgaard et al, 1964) suggests already that the signal acquired across the distillation pathway, and not a pure local surface temperature signal.

Addressed. Sentence now reads, L.48: « *The geographical variability in the ‘isotopic paleothermometer’ is due to controls on  $\delta^{18}\text{O}$  other than related to SAT.* » This includes changes of temperatures along the air mass pathways as SAT and condensation temperatures are linked, thus affecting the Rayleigh distillation.

Lines 59 to 62: “AGCM isotopic studies have focused on the effects of external forcing on the SAT– $\delta^{18}\text{O}$  relationship, including elevation and greenhouse gases across a range of timescales (e.g. Sime et al., 2009b; Werner et al., 2018; Goursaud et al., 2021). A major result is that, for differing time-scales and driving mechanisms, different SAT– $\delta^{18}\text{O}$  relationships can be obtained.” This sentence suggests that this result was only found using isotope enabled GCM studies, while several proxy based studies have also shown this, including relatively old ones, see for instance (Guillevic et al., 2013; Jouzel, 1999).

Here, we focused the paragraph on the use of AGCM, and did not mean that such studies were not made using observations. We thus completed the sentence by beginning with « For instance » to make the link with the preceding sentence, L.59 to L.61 :

« *For instance, AGCM isotopic studies have focused on the effects of external forcing on the SAT– $\delta^{18}\text{O}$  relationship, including elevation and greenhouse gases across a range of timescales (e.g. Sime et al., 2009b; Werner et al., 2018; Goursaud et al., 2021).* »

Lines 78 to 83: “The Historical simulation protocol was defined in the frame of the CMIP Phase 6 (Eyring et al., 2016), with an express purpose to investigate the anthropogenic forcing on climate (Johns et al., 2003) and serve as a benchmark to evaluate model performance (Andrews et al., 2020; Miller et al., 2021; Parsons et al., 2020; Rong et al., 2021; Roach et al., 2020). There have been few examples of studies using Historical simulations focused over Antarctica (Gao et al., 2021; Purich and England, 2021; Raphael et al., 2020; Roach et al., 2020).

Here, we use the Hadley Center general circulation model (HadCM3; GCM), to run six transient Historical simulations.”

This is technically correct, it also implies that HadCM3 is a CMIP6 model, although it is actually a CMIP5 model. The description should first be the model. Then be the transient historical simulations that were done. At this point, for non-modeller specialist such as myself, it is not possible to know what the historical simulation protocol entails, so rather than giving examples of

studies, the key important points that a reader should know should be described here. For instance, it is not clear if/how the surface conditions were prescribed since only the atmospheric component was used. Was the sea ice concentration simulated or prescribed? If it was prescribed, since HadGEM performs relatively poorly for sea ice concentration, surface ocean temperature, and to some extent for the 850hPa temperature (Agosta et al., 2015), how is that affecting the results?

The paragraph is re-ordered as requested. Parts relating to CMIP6 are removed, to prevent confusion, and instead the details of the protocol are given, as requested, after the model description. This includes, as requested some more information on the HadCM3 coupled Atmosphere-Ocean model, and that sea-ice is not prescribed but calculated. The paragraph dedicated to our model description and simulations is now p.3 l.79 to 90:

*“Here, we use the Hadley Center Atmosphere-Ocean general circulation model (HadCM3; AOGCM), to run six transient Historical simulations. HadCM3 is a version of the coupled Atmosphere-Ocean UK Met Office climate model (Pope et al., 2000; Gordon et al., 2000), which means that sea ice is prognostic. The model is equipped with stable water isotopes (Tindall et al., 2009). Its horizontal resolution is  $3.75^\circ \times 2.5^\circ$ , and there are 19 vertical levels (Pope et al., 2000; Gordon et al., 2000; Tindall et al., 2009). The setup of the Historical simulations is described in (Schurer et al., 2014), and follows the recommendations of the third Paleoclimate Modelling Intercomparison Project (PMIP3; Schmidt et al., 2011)(PMIP3; Schmidt et al. 2012). Each simulation is forced with time-varying orbital, solar, volcanic, land-use and well-mixed greenhouse gas forcing. As above, sea ice is not prescribed, rather calculated by the model. Changes in orbital parameters were calculated following (Berger, 1978). Volcanic forcing is that described in (Crowley et al., 2008). The solar forcing follows (Shapiro et al., 2011). Changes in CO<sub>2</sub>, N<sub>2</sub>O and CH<sub>4</sub> were set following the PMIP3 standard (Schmidt et al., 2011). Changes in the abundances of 6 Halocarbons were prescribed following (Tett et al., 2007). Changes in land-cover were prescribed by reclassifying the Global land cover reconstruction developed by (Pongratz et al., 2008). Each of our simulations were only altered by starting each simulation a year apart.”*

Lines 89 to 90: “HadCM3 provides a reasonable representation of Antarctic climate and  $\delta 18\text{O}$  (Turner et al., 2006; Tindall et al., 2009; Holloway et al., 2016).” Tindall et al, 2009 provides a comparison of  $\delta 18\text{O}$  with observations from mostly tropical and temperate regions, with only 2 data points in Antarctica. Holloway et al, 2016 provides a comparison of the outputs of the model and 4 ice core records during the last glacial maximum. To my knowledge, no comparison between modern  $\delta 18\text{O}$  from observations and model outputs has been published. Considering the large warm bias that most of the isotope enabled CMIP5 models suffered which have been fixed in CMIP6 versions (Cauquoin and Werner, 2021; Werner et al., 2018), it feels like this statement does not provide the necessary information to know if we can trust the outputs during the historical periods. Please consider reproducing Figure 1 of (Werner et al., 2018).

Please refer to our above response related to the model evaluation over Antarctica. This is now added in a new Appendix A.

Lines 96 to 97: “Where we regress climate variables against  $\delta 18\text{O}$ , the linear regressions are computed using the stacked individual ensemble members, rather than using the ensemble mean.” Unclear to me. Are you computing the linear regression on a stack of all the individual members ? Or are you computing it against individual members and then stacking the linear regression ? The former seems fairly similar than using the ensemble mean.

We stacked all the members for each climate variable, and then processed linear regressions (thus at the annual scale, on  $153 \times 6 = 918$  points). This is now clarified l.102-104 : « *Where we regress climate variables against  $\delta 18\text{O}$ , the linear regressions are computed using the stacked individual ensemble members, rather than using the ensemble mean. This approach ensures that the ensemble*

*variability is included in our linear regression statistics and increased the number of points on which the regressions are processed. »*

Lines 99 to 101: “Our Historical SAT–d18O linear relationship at the regional scale, as well as at the nearest model grid-cell to each ice core location, are compared with the ECHAM5-wiso slopes and correlation coefficients provided in Stenni et al. (2017).” Why would you use ECHAM5-wiso here when your manuscript is about HadCM3 ? If you’re using an isotope enabled version of ECHAM, why not use ECHAM6 which has been released in 2021. And if the goal is to provide a reference that is published, why is the comparison with observations not included, i.e. (Casado et al., 2017; Fujita and Abe, 2006; Masson-Delmotte et al., 2008; Schlosser et al., 2004; Stenni et al., 2016; Touzeau et al., 2016).

Addressed. Following the reviewers excellent suggestion, we have switched from using the older ECHAM5 results to those from ECHAM6. This does indeed solve many problems in the previous version of the manuscript. As useful implied above, we also add suggestions for further comparisons with observations towards the end of the Section 6 (“Conclusion”), l.329 to 332: *“Finally, more stable water isotope records from Antarctic ice and firn core data are more than needed to evaluate models, as well as to lead model-data investigations of past climates, comparing SAT– $\delta 18O$  relationships from different water stable isotopes enabled model, in line with the work of the Stable Water Isotope Intercomparaison Group 2 (SWING) (Risi et al., 2012).”*

Line 114: “3 Trends in Antarctic SAT, precipitation, sea ice and  $\delta 18O$ ” Is this a result section ? it seems to include results and discussion, but then section 4 and 5 as well. While I don’t think Climate of the Past has a strict rule on which structure to use for manuscript, I am not convinced that the classical structure wouldn’t help the readability of the manuscript.

Thank you for pointing out that there is a lack of signposting of the Results. To address this, we create a new single Results section, out of the previous three results subsections. Because these previous results sections now become subsections of the single Results section, this also necessitates removing subsubsection heading in what is now 3.1.2, because they would be at the three decimal place subsubsection level, which is not permitted. We agree with the reviewer that overall this change improves the structure and readability of the manuscript. To help with signposting we also add a short overview of the Results section: *“This section uses these model data and methods to examine: trends in Antarctic SAT, precipitation, sea ice and  $\delta 18O$ , including at the continental and regional scale; relationships between temperature versus  $\delta 18O$ , including their stability, and model dependency; and finally, the drivers of  $\delta 18O$  changes.”*

Lines 122 to 123: “This is consistent with observations of  $0.12 \pm 0.07$  °C per decade over 1957–2006 (Steig et al., 2009) and  $0.11 \pm 0.08$  °C per decade over 1959–2012 (Nicolas and Bromwich, 2014).” This is only partially true. Jones et al, 2019 reports larger warming across Antarctica when the SAM-congruent trend has been taken into account. Clem et al, 2019 reports temperature increase of 0.6°C per decades at the south pole station, where the map in Figure 1E. reports actually a cooling between 1850–1900 and 1950–2000. ERA5 reports as well a large warming across Antarctica, which is indeed a reanalysis based on satellite observations.

Also, is the comparison really accurate if you compare on the one hand model outputs over all of Antarctica and meteorological observations from N&B which are clearly biased toward coastal regions?

Steig et al. (2009) and Nicholas and Bromwich (2014) were cited to aid comparison with Antarctic-wide SAT trends. Adding the Jones et al. (2019) reference is a very useful suggestion, given they also focus on West Antarctica and Antarctica Peninsula. Given they show that the (positive) trends are the highest for the station located on Antarctic Peninsula, this is added in Section 3.2.1, l.163:

*“At the scale of station locations, (Jones et al., 2019) also show the highest trends for the Peninsula.”*

Thank you to the referee for also pointing the study of Clem et al. (2019). Clem et al. (2019) report an increase of 0.6°C per decade at the south pole station over the period 1989–2018, with record-high annual SAT in 2002, 2009, 2013 and 2013, reflecting a very recent trend (also made clear on Fig. 1c). They attribute this warming to an increase in northerly winds at the South Pole (Fig. 2). For the period 1957–2002 (Fig. 1c), they observe negative trends. They also display that SAT trends simulated by CMIP5 models at South Pole, are lower for the pre-industrial period compared to the historical period (Fig3a). Although these results are valuable, in this case we do not include it in the study as we did not focus on single sites, rather at the regional to continental scale.

Lines 129 to 130: “Forecast System Reanalysis (CFSR), and 7.1±1.5 mm/y per decade from the National Centers for Environmental Prediction reanalyses 2 (NCEP-2) over 1979-2009.”

It seems that different sources of data (observations, reanalyses, or other type of models) are used for different variables. Wouldn't it be valuable to compare all of your variables with one systematic source of data, may it be direct observations, satellite observations, reanalyses...

Agreed, however unfortunately, we are not aware of a single source of measurements or reanalysis product that encompass all addressed variables, particularly the water isotopes. Also, given different classes of data have different types of uncertainties associated, there is also value in comparing to more than one data type.

Lines 166 to 168: “Despite the simulated increases in SAT and precipitation, d18O shows a very weak trend of  $0.04 \pm 0.003$  ‰ per decade ( $r=0.21$ ) over the last 50 years. Interestingly, (Casado et al., 2023) provide a higher trend from 1950–2005 of  $0.11 \pm 0.02$  ‰ per decade. It is unclear why the trend in (Casado et al., 2023) is higher.” The response provided seems insufficient, particularly in light of the extensive sensitivity tests conducted in (Casado et al., 2023) to elucidate the disparities with the trends observed in S(Stenni et al., 2017). It would be helpful to have clarification on the handling of isotopic data from the PAGES2k network in this context, such as the methodology for averaging monthly isotopic data with annual and interannual data. Given that a trend is essentially a mathematical representation, and both this manuscript and Casado et al., 2023 utilise the same dataset, it raises concerns about the disparity in values. Moreover, the methods employed in Casado et al., 2023 were replicated using the outputs generated in Stenni et al., 2017, resulting in a slope of 0.10 permil per decade. Additionally, an alternative method based on dynamical system theory yielded an even larger value.

The  $\delta^{18}\text{O}$  trends given here are those simulated by HadCM3. We attempted to clarify this, l.181 to 182: *“Despite the simulated increases in SAT and precipitation,  $\delta^{18}\text{O}$  simulated by HadCM3 shows a very weak trend of  $0.04 \pm 0.003$  ‰ per decade ( $r=0.21$ ) over the last 50 years.”*

The regional trends calculated by Stenni et al. (2017) over the last 100 years were based on ice core measurements, analysed as unweighted 5y-binned anomalies. This is clarified in the text, l. 192: *“Stenni et al. (2017) made a  $\delta^{18}\text{O}$  trend statistics based on ice core anomalies using unweighted composites over the period 1900-2000, based on 5-years bins.”*

This method differs from Casado et al., 2023, which we believe used resampled sub-annual records, and annual means over a 60 years or less time-window. With data then stacked without independent renormalisation using the variance. Note that we did not compute these results, rather directly took them from Table 2 of Stenni et al. (2017). S5 section of the supplementary material in Casado et al 2023 attributes the differences between Stenni and Casado papers to the different time windows (100 years for A2k against 35-45 years in the Casado paper).

Finally, we are very aware of the added value that brought by Casado et al 2023, and revise this sentence to include water stable isotope enabled GCM, l.201 to 205: *“These disparities could be explained by the different time windows, the different methodologies, the lack of ice core data to make representative regional reconstructions, or a model discrepancy. While Casado et al. (2023) carefully investigated the impact of the data stack method and the time-window on the  $\delta^{18}O$  reported trends, we suggest that an extended study could compare the statistical and dynamical methods on both ice core data and water stable isotope enabled GCM outputs to complete the analysis.”*

Lines 169 to 170: “Before this, we provide a brief overview of the regional picture. At the regional scale, over the Historical period, trends are small (Figure 2).”

The regions in Figure 2 seem to be different than the ones in Stenni et al 2017 beyond the impact that the model grid would do to the attribution. For instance, none of the coastal grid points are included in your analysis, which differs strongly from Stenni et al. Victoria Land region extend further east near the coast (with the strong consequence of adding an additional core in this grid point compared to Stenni et al). Another notable difference comes from the lack of the coast part in DML coast region, which means that almost none of the ice core available for this region are represented in your average. As this seems to be a significant difference compared to Stenni et al, 2017, where several pages were included to explain the choice of the region, it needs to be justified.

To compute regional results, S.O used exactly the same code that she used for the Stenni et al. (2017) study. The notable differences come from the low resolution of the HadCM3 model ( $2.75^\circ \times 3.5^\circ$ , lat x lon), which explains the highest differences on coastal areas. We agree this is indeed a significant limitation, as reported l.307.

Lines 171 to 172: “and is the highest for the Weddell coast with a trend of 0.05 ‰ per decade ( $r=0.39$ ), and the strongest for the peninsula with a trend of 0.04 ‰ per decade ( $r=0.57$ ).”  
Which one is it ? The "highest" and the "strongest" should be the same.

High/low refers to gradients of the linear regressions while strong/weak refers to the correlation coefficient of the linear regressions. This is now clarified, l.187 to 190: *“In terms of linear relationship, it is null for the Victoria Land, while the gradient is the highest for the Weddell coast with a trend of 0.05 ‰ per decade ( $r=0.39$ ), and the correlation coefficient is the highest (e.g. the strongest linear relationship) for the peninsula with a trend of 0.04 ‰ per decade ( $r=0.57$ ). ”*

Lines 183 to 185: “These disparities could be explained by the different time windows, the different methodologies or the lack of ice core data to make representative regional reconstructions.” All of these hypotheses can be readily examined to ensure the robustness of the arguments detailed here. For the first hypothesis, it might be beneficial to incorporate a table in the supplementary materials, offering a comparison for the same time windows. Adaptations in methodologies can be explored, and Supplementary Table S3 in Casado et al., 2023, already presents trends using both their approach and the one from Stenni et al., 2017. Additionally, the absence of ice cores to establish representative regional reconstructions can be tested by focusing solely on specific grid points of the model corresponding to the ice core locations, comparing them to the regional average encompassing all grid points in the region. A fourth option, which the author does not explicitly address, is the potential bias or insufficient representation of variability in HadCM3, as suggested by Casado et al., 2023, particularly for most CMIP models.

This is another good point. The possibility that model may have insufficient representation of variability in HadCM3, as suggested by Casado et al., 2023, alongside the other possible reasons for the discrepancies outlined by the reviewer are briefly added at l.201: *“These disparities could be*

*explained by the different time windows, the different methodologies, the lack of ice core data to make representative regional reconstructions, or a model discrepancy.”*

While recomputing our regional  $\delta^{18}\text{O}$  trends, we have also taken the opportunity to check significance and include that several of these regional (HadCM3) trends are not significant (at  $p\text{-value}>0.05$ ): over the last 50 years. Only three regions, the Indian, the Weddell and the Dronning Maud Land coastal regions display significant linear relationships. Figure 2 is adapted by shading in grey non-significant trends and amending the caption: “Grey shaded rows correspond to non significant relationships ( $p\text{-value}>0.05$ ).” In the text, we removed l. 185 to 187: “Over the last fifty years, a part from the Victoria Land where a very weak trend appear, other regions present weaker trends with correlation coefficients now ranging from 0.11 to 0.38 while gradients increase with values ranging from 0.03 ‰ per decade for the WAIS and the plateau, to 0.14 ‰ per decade for the Weddell coast.”

And instead l.190 to 192 now read: “Over the last fifty years, only three regions, the Indian, the Weddell and Dronning Maud Land coastal regions keep on displaying significant  $\delta^{18}\text{O}$  trends, that double or more compared to the Historical period, with gradients of 0.08, 0.08 and 0.14 ‰ per decade respectively.” Also, we adapted the comparison with the results from Casado et al. (2023): “They found gradients with the same range of values, from 0.09 ‰ for the Indian coast, to 0.19 ‰ for the Weddell coast, while they found significant relationships where we do not, for time windows varying from 40 to 65 years. Note that for most of the regions, the significance of our simulated relationships disappear for time windows shorter than 75 years (Appendix D). This could be explained either by the simulated anthropogenic variability being too low, as suggested by (Casado et al., 2023), or a change of the drivers on  $\delta^{18}\text{O}$ .”

As suggested, we looked at the impact of the window length on our simulated regional  $\delta^{18}\text{O}$  trends. Results were added in Appendix D. Except for Dronning Maud Land and the Weddell coast, we do not obtain higher gradients, but we observe, as written above, that most of the relationships become insignificant when taking window length are shorter than 75 years. This can be explained either by an underestimation of the variability (although we find Antarctic-wide SAT trends consistent with observations), or a change in the main drivers of  $\delta^{18}\text{O}$ .

Finally, as reported in Stenni et al. (2017) and other studies, it is clear that  $\delta^{18}\text{O}$  data remain sparse in some regions of Antarctica and that more data are needed for a more robust representativity.

Lines 194 to 206: This is an interesting discussion, but again, it fails to address the elephant in the room which is the model biases. The maps show areas with non-significant link between isotopic composition and temperature in the model, which seems sound and robust, but how does it compared to observations in the field? For instance, no correlation is found at the site of Vostok, where precipitation isotopic composition shows a significant correlation ( $R = 0.63$ , slope of 0.35 permil per degree) (Touzeau et al., 2016), while the map suggest a slope of 0 with non-significant correlation. The slope and correlation at Dome C also seems lower (below 0.3 with a  $r < 0.3$ ) than in observations ( $R^2 = 0.63$  and slope of 0.49) (Stenni et al., 2016). In general, any discussions which could support the validity of the model outputs would strengthen the manuscript, or at least provide confidence interval on the range of values that can actually be interpreted.

Fully agreed, these sentences are therefore modified to also reflect similar observational - as well as model - results, l.220 to 223: “Non significant relationships were also reported in observations and model outputs. For instance, Goursaud et al. (2018) report no SAT- $\delta^{18}\text{O}$  relationship at the annual scale over the coast of Dronning Maud Land, the Victoria Land, some of the Indian coast and the Peninsula. An absence of SAT- $\delta^{18}\text{O}$  relationship derived from firn/ice cores were also published (e.g. Goursaud et al., 2019; Bertler et al., 2011; Vega et al., 2016; Goursaud et al., 2017).”



Lines 211: “Here, and also for other warm climate results” Is it actually relevant? The manuscript is about historical reconstructions. This could potentially be discussed in the end of the discussion, but this subsection feels like results.

Again fully agreed, that part of the sentence is removed, l.235: “*Here, we suggest this is mainly driven by sea ice retreat (See section 3.3).*”

Lines 219 to 220: “Interestingly, however, this is not the case when comparing between the last 50 years of our HadCM3 simulation and the ECHAM5-wiso simulation.” It is obsolete to compare your result with yet another CMIP5 model, when the isotope enabled version ECHAM6 wiso is available for more than 3 years.

Addressed. Please see the response (above) related to the replacement ECHAM5-wiso results from Stenni et al. (2017) with ECHAM6-wiso results.

Lines 225 to 227: “all the historical SAT-d18O relationships are different from the LGM-PI ECHAM5, and LIG-PI HadCM3 relationships: Werner et al. (2018) report LGM-PI regional gradients in ECHAM5 that are 17-26% lower, while (Sime et al., 2009b) and (Holloway et al., 2016) present LIG-PI regional gradients that are ~50% lower for HadCM3.” Nobody would expect the historical and the LGM-PI relationships to be the same, considering the difference of time scales and underlying mechanisms driving the temperature changes. Is this really necessary in this manuscript which is about historical changes in the isotope-temperature relationship?

Sentence removed.

Lines 228: “ECHAM5 towards ERA-40 reanalysis,” There are two generations of newer ERA products. It is unclear why the authors did not use either of these products. If the nudging is not conducted with the newer products in a revised version of the manuscript, which is what is really needed here, a clear justification for this omission will be required.

The first version of this manuscript used the same model runs as in Stenni et al. (2017), just to have something to compare to HadCM3. These were used from 1979 – 2013 to exclude the observed SAT bias before 1979 (before the assimilation of satellite data in the reanalyses; Goursaud et al., 2018). From 1979 the model was nudged towards ERA-interim. We corrected l.235 : « *towards ERA-interim.* »

Lines 238 to 239: “The primary mechanism driving continental-scale SAT-d18O decoupling is the simulated loss of sea ice during the historical period (Figure 5DH).” The rationale that could explain how to make this assessment is not supported by Figure 4D to H. The patterns of sea ice concentration anomalies does not explain any link with the variations of temperature and isotopic composition inside Antarctica by itself. There is no correlation provided, no mechanism, no simulations in which the sea ice concentration is artificially varied to support this assessment. Overall, this entire section falls short in establishing any form of causality and warrants a comprehensive revision. The conclusion should be revised once the rest of the manuscript has been reassessed.

The section on drivers of d18O was indeed one of the more tricky parts of the manuscript to construct. We fully agree with the reviewer that Fig4 alone does not make the case that loss of sea ice is a key driver of d18O, and also that the previous draft was not particularly well written in places, with key references to Figure 7 missing. This section is now re-written as follows:

*“We use two approaches to investigate the mechanisms driving simulated  $\delta^{18}\text{O}$  changes. First, we separate and compare extreme warm and cold years both for annual (Figure 4, Table C1) and seasonal (Figure 5) data by generating (annual and seasonal) composites with mean annual Antarctic SAT anomalies greater than plus or minus two standard deviations from the mean, respectively. Second, we isolate the impact of changing precipitation seasonality on  $\delta^{18}\text{O}$ , showing simple months values (Figure 6) and also following the decomposition method used in Liu and Battisti (2015); Holloway et al. (2016) and Sime et al. (2019) (Figure 7). As expected, the spatial patterns of SAT, and sea ice anomalies tend to vary together, with the pattern is approximately mirrored between cold and warm composites (Figure 4, top and bottom panels, respectively). Whilst fully isolating the drivers of  $\delta^{18}\text{O}$  is tricky, together Fig 4 to 7 suggest that the primary mechanism driving continental-scale SAT- $\delta^{18}\text{O}$  decoupling in HadCM3 is the simulated loss of sea ice over the historical period (Figure 5dh).*

*The September average sea ice area across the warm composite is  $5.8 \times 10^6$  km<sup>2</sup> less than in the cold composite. Given that this reduction occurs primarily during winter (Figure 5c; there is almost no summertime sea ice around Antarctica), warmer years tend to receive relatively more precipitation during winter months compared to cold years, partially offsetting the warming signal in  $\delta^{18}\text{O}$ . This can be seen in Figure 5, displaying seasonal anomalies (for the winter season, e.g. from June to August, and for the summer season, e.g. from December to February) in precipitation,  $\delta^{18}\text{O}$  and sea ice between the warm and cold composites: the largest (smallest) precipitation and  $\delta^{18}\text{O}$  anomalies occur during winter (summer) months. Precipitation anomalies peak in autumn and winter, whilst  $\delta^{18}\text{O}$  anomalies peak in winter and spring (Figure 6), the latter coincident with the annual maximum sea ice extent and largest sea ice area anomalies. The relative increase in winter precipitation during warm years acts to reduce  $\delta^{18}\text{O}$  across Antarctica, compared to if the seasonality of precipitation remained unchanged. This is perhaps clearest seen in Fig. 7, where Fig. 7a is predominantly blue - which says that precipitation seasonality changes are acting to decrease  $\delta^{18}\text{O}$ . The effect of changing seasonality is particularly large in the Indian, Dronning Maud Land and Victoria Land (through the Wilkes Land) sectors, which are prone to air mass intrusions (Fig. 5c and 7a).”*

## Bibliography

- Agosta, C., Fettweis, X. and Datta, R.: Evaluation of the CMIP5 models in the aim of regional modelling of the Antarctic surface mass balance, *Cryosph.*, 9(6), 2311–2321, doi:10.5194/tc-9-2311-2015, 2015.
- Bertler, N. A. N., Mayewski, P. A., & Carter, L. (2011). Cold conditions in Antarctica during the Little Ice Age—Implications for abrupt climate change mechanisms. *Earth and Planetary Science Letters*, 308(1-2), 41-51.
- Casado, M., Orsi, A. J. and Landais, A.: On the limits of climate reconstruction from water stable isotopes in polar ice cores, *Past Glob. Chang. Mag.*, 25(3), 146–147, doi:10.22498/pages.25.3.146, 2017.
- Casado, M., Hébert, R., Faranda, D. and Landais, A.: The quandary of detecting the signature of climate change in Antarctica, *Nat. Clim. Chang.* [online] Available from: <https://doi.org/10.1038/s41558-023-01791-5>, 2023.
- Cauquoin, A. and Werner, M.: High-Resolution Nudged Isotope Modeling With ECHAM6-Wiso: Impacts of Updated Model Physics and ERA5 Reanalysis Data, *J. Adv. Model. Earth Syst.*, 13(11), e2021MS002532, doi:<https://doi.org/10.1029/2021MS002532>, 2021.
- Clem, K. R., Fogt, R. L., Turner, J., Lintner, B. R., Marshall, G. J., Miller, J. R. and Renwick, J. A.: Record warming at the South Pole during the past three decades, *Nat. Clim. Chang.*, 10(8), 762–770, 2020.
- Dee, D. P., Uppala, S. M., Simmons, A. J., Berrisford, P., Poli, P., Kobayashi, S., Andrae, U., Balmaseda, M. A., Balsamo, G. and Bauer, d P.: The ERA-Interim reanalysis: Configuration and performance of the data assimilation system, *Q. J. R. Meteorol. Soc.*, 137(656), 553–597, 2011.
- Dittmann, A., Schlosser, E., Masson-Delmotte, V., Powers, J. G., Manning, K. W., Werner, M. and Fujita, K.: Precipitation regime and stable isotopes at Dome Fuji, East Antarctica, *Atmos. Chem. Phys.*, 16(11), 6883–6900, doi:10.5194/acp-16-6883-2016, 2016.
- Eayrs, C., Li, X., Raphael, M. N. and Holland, D. M.: Rapid decline in Antarctic sea ice in recent years hints at future change, *Nat. Geosci.*, 14(7), 460–464, doi:10.1038/s41561-021-00768-3, 2021.
- Ekaykin, A. A., Lipenkov, V. Y., Barkov, N. I., Petit, J. R. and Masson-Delmotte, V.: Spatial and temporal variability in isotope composition of recent snow in the vicinity of Vostok station, Antarctica: implications for ice-core record interpretation, *Ann. Glaciol.*, 35(1), 181–186, doi:10.3189/172756402781816726, 2002.
- Fujita, K. and Abe, O.: Stable isotopes in daily precipitation at Dome Fuji, East Antarctica, *Geophys. Res. Lett.*, 33(18), doi:10.1029/2006GL026936, 2006.
- Goursaud, S., Masson-Delmotte, V., Favier, V., Preunkert, S., Fily, M., Gallée, H., ... & Werner, M. (2017). A 60-year ice-core record of regional climate from Adélie Land, coastal Antarctica. *The Cryosphere*, 11(1), 343-362.
- Goursaud, S., Masson-Delmotte, V., Favier, V., Orsi, A., & Werner, M. (2018). Water stable isotope spatio-temporal variability in Antarctica in 1960–2013: observations and simulations from the ECHAM5-wiso atmospheric general circulation model. *Climate of the Past*, 14(6), 923-946.

- Goursaud, S., Masson-Delmotte, V., Favier, V., Preunkert, S., Legrand, M., Minster, B., & Werner, M. (2019). Challenges associated with the climatic interpretation of water stable isotope records from a highly resolved firn core from Adélie Land, coastal Antarctica. *The Cryosphere*, 13(4), 1297–1324.
- Guillevic, M., Bazin, L., Landais, A., Kindler, P., Orsi, A., Masson-Delmotte, V., Blunier, T., Buchardt, S. L., Capron, E. and Leuenberger, M.: Spatial gradients of temperature, accumulation and  $\delta^{18}\text{O}$ -ice in Greenland over a series of Dansgaard–Oeschger events, *Clim. Past*, 9(3), 1029–1051, 2013.
- Hersbach, H., Bell, B., Berrisford, P., Hirahara, S., Horányi, A., Muñoz-Sabater, J., Nicolas, J., Peubey, C., Radu, R., Schepers, D., Simmons, A., Soci, C., Abdalla, S., Abellan, X., Balsamo, G., Bechtold, P., Biavati, G., Bidlot, J., Bonavita, M., De Chiara, G., Dahlgren, P., Dee, D., Diamantakis, M., Dragani, R., Flemming, J., Forbes, R., Fuentes, M., Geer, A., Haimberger, L., Healy, S., Hogan, R. J., Hólm, E., Janisková, M., Keeley, S., Laloyaux, P., Lopez, P., Lupu, C., Radnoti, G., de Rosnay, P., Rozum, I., Vamborg, F., Villaume, S. and Thépaut, J.-N.: The ERA5 global reanalysis, *Q. J. R. Meteorol. Soc.*, 146(730), 1999–2049, doi:<https://doi.org/10.1002/qj.3803>, 2020.
- Jones, M. E., Bromwich, D. H., Nicolas, J. P., Carrasco, J., Plavcová, E., Zou, X. and Wang, S.-H.: Sixty Years of Widespread Warming in the Southern Middle and High Latitudes (1957–2016), *J. Clim.*, 32(20), 6875–6898, doi:10.1175/JCLI-D-18-0565.1, 2019.
- Jones, T. R., Roberts, W. H. G., Steig, E. J., Cuffey, K. M., Markle, B. R. and White, J. W. C.: Southern Hemisphere climate variability forced by Northern Hemisphere ice-sheet topography, *Nature*, 554, 351 [online] Available from: <https://doi.org/10.1038/nature24669>, 2018.
- Jouzel, J.: Calibrating the isotopic paleothermometer, *Science* (80-. ), 286(5441), 910–911, 1999.
- Kino, K., Okazaki, A., Cauquoin, A. and Yoshimura, K.: Contribution of the Southern Annular Mode to variations in water isotopes of daily precipitation at Dome Fuji, East Antarctica, *J. Geophys. Res. Atmos.*, 126(23), e2021JD035397, 2021.
- Laepfle, T. and Huybers, P.: Ocean surface temperature variability: Large model–data differences at decadal and longer periods, *Proc. Natl. Acad. Sci.*, 111(47), 16682–16687, doi:10.1073/pnas.1412077111, 2014.
- Landais, A., Ekaykin, A., Barkan, E., Winkler, R. and Luz, B.: Seasonal variations of  $^{17}\text{O}$ -excess and  $^{18}\text{O}$ -excess in snow precipitation at Vostok station, East Antarctica, *J. Glaciol.*, 58(210), 725–733, doi:10.3189/2012JoG11J237, 2012.
- Landais, A., Casado, M., Prié, F., Magand, O., Arnaud, L., Ekaykin, A., Petit, J.-R., Picard, G., Fily, M. and Minster, B.: Surface studies of water isotopes in Antarctica for quantitative interpretation of deep ice core data, *Comptes Rendus Geosci.*, 2017.
- Lorius, C., Merlivat, L. and Hagemann, R.: Variation in the mean deuterium content of precipitations in Antarctica, *J. Geophys. Res.*, 74(28), 7027–7031, doi:10.1029/JC074i028p07027, 1969.
- Marshall, G. J., & Thompson, D. W. (2016). The signatures of large-scale patterns of atmospheric variability in Antarctic surface temperatures. *Journal of Geophysical Research: Atmospheres*, 121(7), 3276–3289.

Masson-Delmotte, V., Hou, S., Ekaykin, A., Jouzel, J., Aristarain, A., Bernardo, R. T., Bromwich, D., Cattani, O., Delmotte, M., Falourd, S., Frezzotti, M., Gallée, H., Genoni, L., Isaksson, E., Landais, A., Helsen, M. M., Hoffmann, G., Lopez, J., Morgan, V., Motoyama, H., Noone, D., Oerter, H., Petit, J. R., Royer, A., Uemura, R., Schmidt, G. A., Schlosser, E., Simões, J. C., Steig, E. J., Stenni, B., Stievenard, M., van den Broeke, M. R., van de Wal, R. S. W., van de Berg, W. J., Vimeux, F. and White, J. W. C.: A Review of Antarctic Surface Snow Isotopic Composition: Observations, Atmospheric Circulation, and Isotopic Modeling\*, *J. Clim.*, 21(13), 3359–3387, doi:10.1175/2007JCLI2139.1, 2008.

Schlosser, E., Reijmer, C., Oerter, H. and Graf, W.: The influence of precipitation origin on the  $\delta^{18}\text{O}$ -T relationship at Neumayer station, Ekstrmisen, Antarctica, *Ann. Glaciol.*, 39, 41–48, 2004.

Shao, Z.-G. and Ditlevsen, P. D.: Contrasting scaling properties of interglacial and glacial climates, *Nat. Commun.*, 7, 10951, 2016.

Stenni, B., Scarchilli, C., Masson-Delmotte, V., Schlosser, E., Ciardini, V., Dreossi, G., Grigioni, P., Bonazza, M., Cagnati, A., Frosini, D., Karlicek, D., Risi, C., Udisti, R. and Valt, M.: Three-year monitoring of stable isotopes of precipitation at Concordia Station, East Antarctica, *Cryosph.*, 2016(special issue IPICS 2016), 1–30, doi:10.5194/tc-2016-142, 2016.

Stenni, B., Curran, M. A. J., Abram, N., Orsi, A., Goursaud, S., Masson-Delmotte, V., Neukom, R., Goosse, H., Divine, D. and Van Ommen, T.: Antarctic climate variability on regional and continental scales over the last 2000 years, *Clim. Past*, 13, 1609–1634, 2017.

Touzeau, A., Landais, A., Stenni, B., Uemura, R., Fukui, K., Fujita, S., Guilbaud, S., Ekaykin, A., Casado, M., Barkan, E., Luz, B., Magand, O., Teste, G., Le Meur, E., Baroni, M., Savarino, J., Bourgeois, I. and Risi, C.: Acquisition of isotopic composition for surface snow in East Antarctica and the links to climatic parameters, *Cryosph.*, 10(2), 837–852, doi:10.5194/tc-10-837-2016, 2016.

Vega, C. P., Schlosser, E., Divine, D. V., Kohler, J., Martma, T., Eichler, A., ... & Isaksson, E. (2016). Surface mass balance and water stable isotopes derived from firn cores on three ice rises, Fimbul Ice Shelf, Antarctica. *The Cryosphere*, 10(6), 2763-2777.

Werner, M., Jouzel, J., Masson-Delmotte, V. and Lohmann, G.: Reconciling glacial Antarctic water stable isotopes with ice sheet topography and the isotopic paleothermometer, *Nat. Commun.*, 9(1), 3537, doi:10.1038/s41467-018-05430-y, 2018.

Zhang, Y., Wang, Y., & Hou, S. (2022). Reliability of Antarctic air temperature changes from Polar WRF: A comparison with observations and MAR outputs. *Atmospheric Research*, 266, 105967.

Zhu, F., Emile-Geay, J., McKay, N. P., Hakim, G. J., Khider, D., Ault, T. R., Steig, E. J., Dee, S. and Kirchner, J. W.: Climate models can correctly simulate the continuum of global-average temperature variability, *Proc. Natl. Acad. Sci.*, 116(18), 8728–8733, 2019.
